# Supplementary material
Source: HighWire-hosted journal article supplement (https://www.cmaj.ca/highwire/filestream/58243/field_highwire_adjunct_files/0/trends-austin-at-1.pdf)
Supplement: trends-austin-at-1.pdf [file trends-austin-at-1.pdf]

### **Appendix 1: Rationale for using a 90-day window after discharge for filling a prescription and for combining angiotensin-converting-enzyme inhibitors and angiotensin-receptor blockers**

We chose a window of 90 days because this reflects what was done in a previous hospital report card on post-discharge drug use in myocardial infarction patients.<sup>1</sup> Furthermore, recent research has shown that over 91% of discharged myocardial infarction patients who received a discharge prescription for an angiotensin-converting-enzyme (ACE) inhibitors,  $\beta$ -blockers or a statin filled the prescription within 90 days of hospital discharge.<sup>2</sup> We examined use of ACE inhibitors and angiotensin-receptor blockers together since the prescribing of either agent is used as an indicator of quality of care in myocardial infarction patients by the United States Department of Health and Human Services.<sup>3</sup> Furthermore, clinical practice guidelines recommend the substitution of angiotensin-receptor blockers in patients who are intolerant of ACE inhibitors.<sup>4</sup> In a preliminary examination of the data we found evidence of a substitutionary behaviour by physicians in Ontario: in recent years prescribing of ACE inhibitors decreased while that of angiotensin-converting enzyme increased. Finally, recent studies have found angiotensin-receptor blockers to be suitable alternatives to ACE inhibitors in patients with high-risk acute myocardial infarction<sup>5</sup> and in reducing atherosclerotic events.<sup>6</sup>

#### **References:**

1. Tu JV, Austin P, Rochon P, et al. Secondary prevention after acute myocardial infarction, congestive heart failure and coronary artery bypass graft surgery in Ontario. In: Naylor CD, Slaughter PM, editors. *Cardiovascular Health and Services in Ontario: An ICES Atlas*. Toronto (ON): Institute for Clinical Evaluative Sciences; 1999. p.199–238.
2. Jackevicius CA, Li P, Tu JV. Prevalence, predictors and outcomes of primary nonadherence post-acute myocardial infarction. *Circulation* 2008;117:1028-36.
3. United States Department of Health and Human Services. Available: [www.hospitalcompare.hhs.gov](http://www.hospitalcompare.hhs.gov) (accessed 2007 Sept 11).
4. Anderson JL, Adams CD, Antman EM, et al. ACC/AHA 2007 Guidelines for the management of patients with unstable angina/non-ST-elevation myocardial infarction: a report of the American College of Cardiology/American Heart Association Task Force on Practice Guidelines (Writing Committee to Revise the 2002 Guidelines for the Management of Patients With Unstable Angina/Non-ST-Elevation Myocardial Infarction) developed in collaboration with the American College of Emergency Physicians, the Society for Cardiovascular Angiography and Interventions, and the Society of Thoracic Surgeons endorsed by the American Association of Cardiovascular and Pulmonary Rehabilitation and the Society for Academic Emergency Medicine. *J Am Coll Cardiol* 2007;50:e1-157.
5. Lee VC, Rhew DC, Dylan M, et al. Meta-analysis: angiotensin-receptor blockers in chronic heart failure and high-risk acute myocardial infarction. *Ann Intern Med* 2004;141:693-704.
6. McMurray J, Solomon S, Pieper K, et al. The effect of valsartan, captopril, or both on atherosclerotic events after acute myocardial infarction: an analysis of the Valsartan in Acute Myocardial Infarction Trial (VALIANT). *J Am Coll Cardiol* 2006;47:726-33.
